# Supplementary material
Source: PubMed Central journal article supplement (PMC7603424)

**Fig. 1C**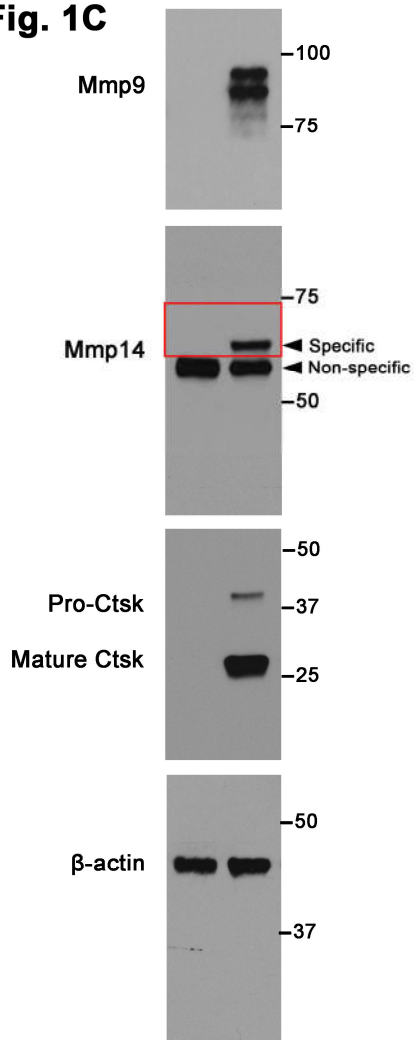**Fig. 2H**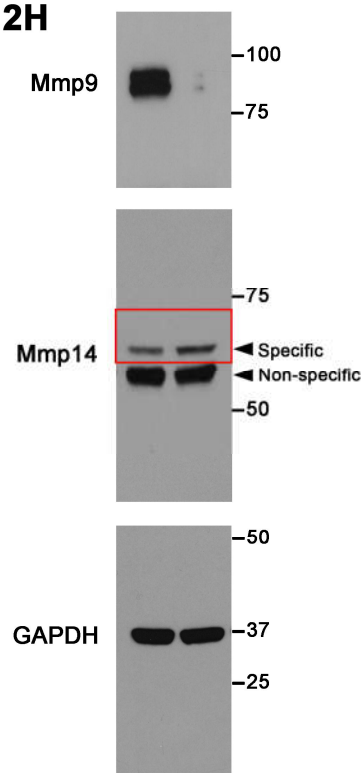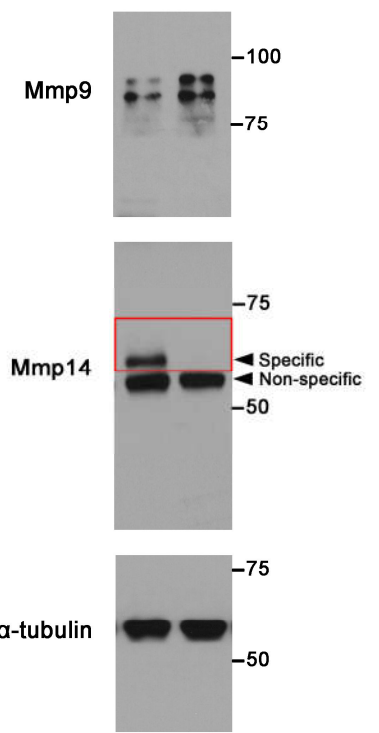**Fig. 4B**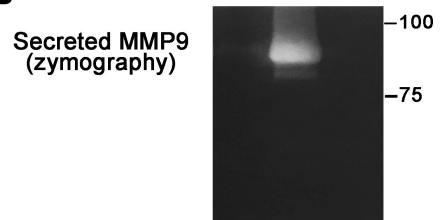**Fig. 3C**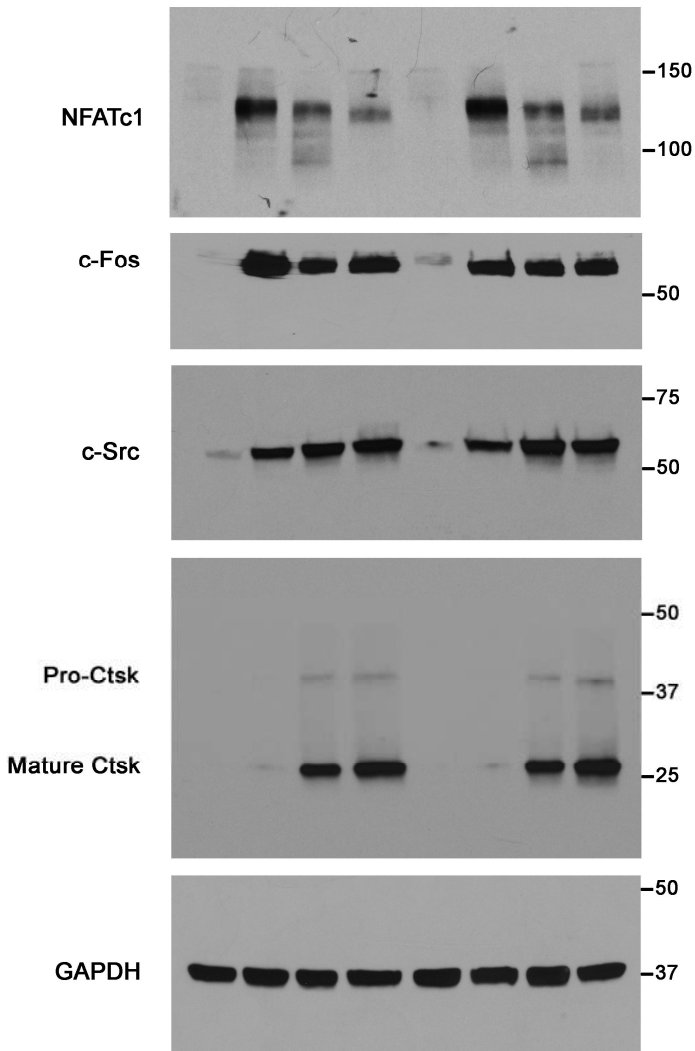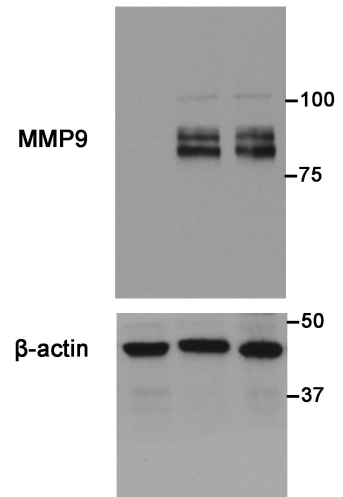**Fig. 4C**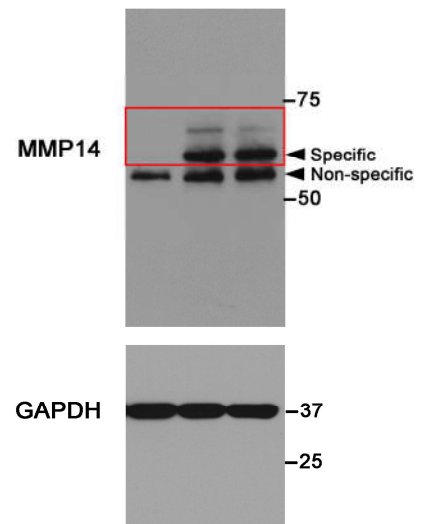

**Fig. 5D**

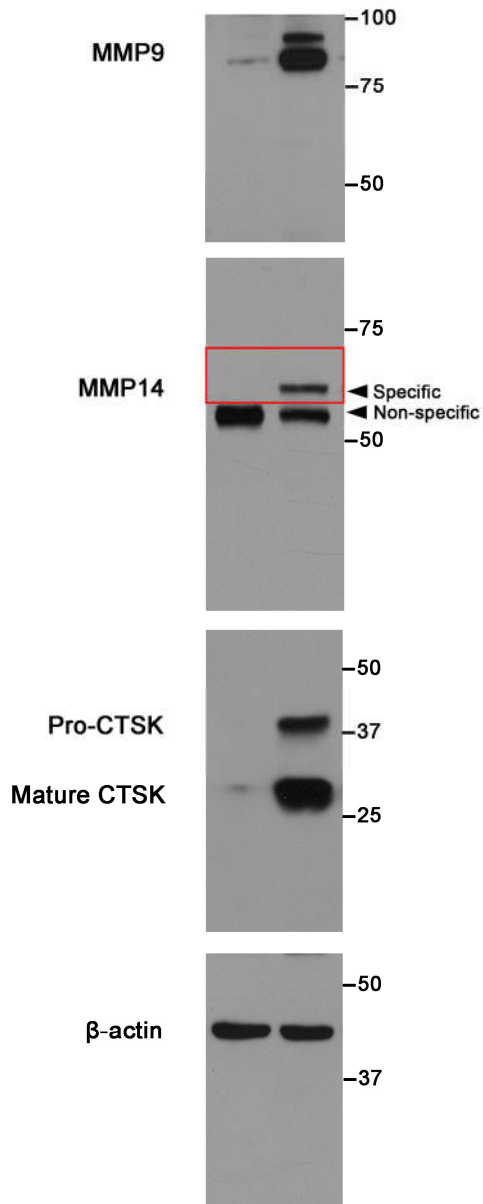

**fig. S1F**

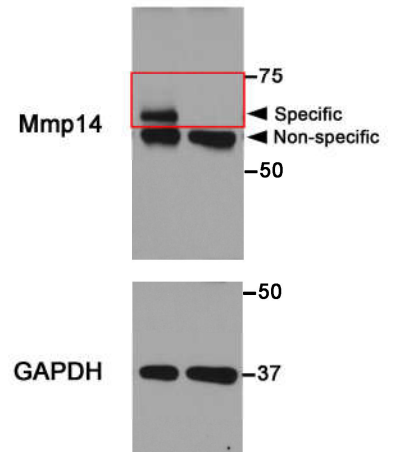

**fig. S4A**

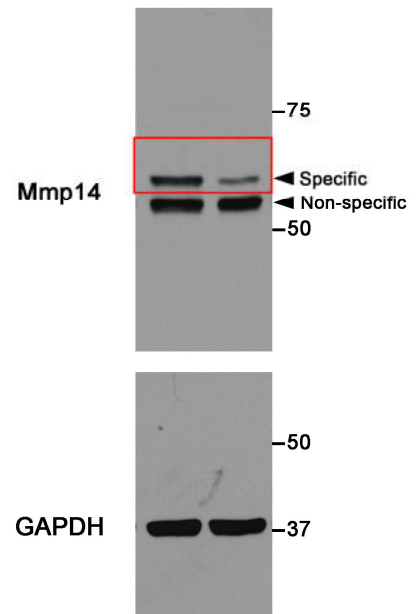

**fig. S1C**

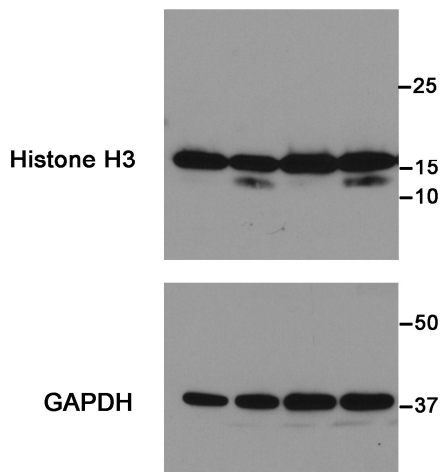

**fig. S5F**

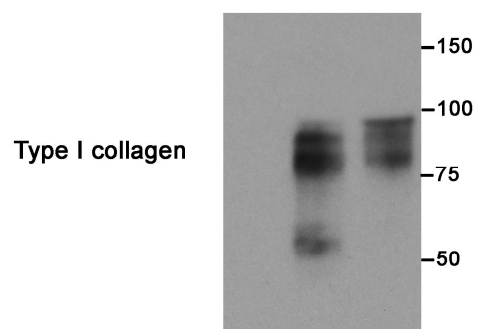

Supplement: NIHMS1635140-supplement-Data_File_S2.pdf [file NIHMS1635140-supplement-Data_File_S2.pdf]
